# Supplementary material for: A Practical Guide to the Treatment of Dravet Syndrome with Anti-Seizure Medication
Source: Springer Nature journal article supplement (doi:10.1007/s40263-022-00898-1), 2022-02-14
Supplement: MOESM1 [file 40263_2022_898_MOESM1_ESM.pdf]

## **A Practical Guide to the Treatment of Dravet Syndrome with Anti-Seizure Medication**

Adam Strzelczyk, MD, MHBA<sup>1,2</sup> and Susanne Schubert-Bast, MD<sup>1,2,3</sup>

<sup>1</sup>Epilepsy Center Frankfurt Rhine-Main, Center of Neurology and Neurosurgery, Goethe-University Frankfurt, Frankfurt am Main, Germany

<sup>2</sup>LOEWE Center for Personalized and Translational Epilepsy Research (CePTER), Goethe-University Frankfurt, Frankfurt am Main, Germany

<sup>3</sup>Department of Neuropediatrics, Goethe-University Frankfurt, Frankfurt am Main, Germany

Correspondence to: Prof. Dr. med. Adam Strzelczyk  
Epilepsy Center Frankfurt Rhine-Main  
Goethe-University Frankfurt  
Schleusenweg 2-16  
60528 Frankfurt am Main, Germany  
phone: +49-69-6301-7466  
fax: +49-69-6301-84466  
mail: [strzelczyk@med.uni-frankfurt.de](mailto:strzelczyk@med.uni-frankfurt.de)

**Supplemental Table S1 Effect of anti-seizure medications (ASMs) used in the treatment of Dravet syndrome on hormonal contraceptives (HCs) and the effect of HCs on ASMs**

|     | <b>Effect of ASM on HC</b>                                                                                                                                                           | <b>Effect of HC on ASM</b>                                                                                                      |
|-----|--------------------------------------------------------------------------------------------------------------------------------------------------------------------------------------|---------------------------------------------------------------------------------------------------------------------------------|
| VPA | No clinically relevant effects identified                                                                                                                                            | Possibility of decreased VPA efficacy requiring monitoring when initiating or discontinuing oestrogen-containing contraceptives |
| CLB | Some HCs are metabolised by CYP3A4, and therefore their effectiveness may be decreased with CLB, which is a weak CYP3A4 inducer; non-hormonal forms of contraception are recommended | No clinically relevant effects identified                                                                                       |
| STP | No clinically relevant effects identified                                                                                                                                            |                                                                                                                                 |
| CBD | No known effects; being evaluated in clinical trial NCT04396730                                                                                                                      |                                                                                                                                 |
| FFA | No clinically relevant effects identified                                                                                                                                            |                                                                                                                                 |
| TPM | Possibility of decreased HC (EE-containing) efficacy at TPM doses of $\geq 200$ mg; non-hormonal forms of contraception are recommended                                              | No clinically relevant effects identified                                                                                       |
| BR  | No clinically relevant effects identified                                                                                                                                            |                                                                                                                                 |
| LEV | No clinically relevant effects identified                                                                                                                                            |                                                                                                                                 |
| BRV | No clinically relevant effects identified                                                                                                                                            |                                                                                                                                 |
| ZNS | No clinically relevant effects identified                                                                                                                                            |                                                                                                                                 |
| ESM | No clinically relevant effects identified                                                                                                                                            |                                                                                                                                 |
| PER | Possibility of decreased HC (progestogen-containing) efficacy at PER doses of $\geq 12$ mg/day; non-hormonal forms of contraception are recommended                                  | No clinically relevant effects identified                                                                                       |

*BR* bromide, *BRV* brivaracetam, *CBD* cannabidiol, *CLB* clobazam, *EE* ethinyl estradiol, *ESM* ethosuximide, *LEV* levetiracetam, *PER* perampanel, *STP* stiripentol, *TPM* topiramate, *VPA* valproate, *ZNS* zonisamide

**Supplemental Table S2 Practical details of other anti-seizure medications used for the treatment of seizures in patients with Dravet syndrome**

|     | Indication                                                                                                                                   | MOA                                                                                                                                                                                 | Dosage                                                                                                                                | Safety considerations                                                                                                                                                                                 | ASM drug-drug interactions                                                                                                                                                                                                                    |
|-----|----------------------------------------------------------------------------------------------------------------------------------------------|-------------------------------------------------------------------------------------------------------------------------------------------------------------------------------------|---------------------------------------------------------------------------------------------------------------------------------------|-------------------------------------------------------------------------------------------------------------------------------------------------------------------------------------------------------|-----------------------------------------------------------------------------------------------------------------------------------------------------------------------------------------------------------------------------------------------|
| LEV | Adjunctive therapy for partial onset seizures with or without secondary generalisation<br>EU: from 1 month of age<br>US: from 4 years of age | Multiple including modulation of synaptic neurotransmitter release via binding to the synaptic vesicle protein SV2A in the brain                                                    | Depending on age:<br>Initial: 7–10 mg/kg/day<br>Target: Increase in steps of 7–10 mg/kg/day every 2 weeks<br>Maximum: 30–60 mg/kg/day | Main AEs include: nasopharyngitis, somnolence, headache, fatigue and dizziness.<br><br>Warning: may cause psychotic symptoms and behavioural abnormalities including irritability and aggressiveness. | None                                                                                                                                                                                                                                          |
| BRV | Adjunctive therapy for partial onset seizures with or without secondary generalisation<br>EU: from 4 years<br>US: from 16 years              | Multiple including binding to the synaptic vesicle protein SV2A in the brain but with greater selectivity and potency than LEV                                                      | Initial: 1 mg/kg/day<br>Target: 2 mg/kg/day<br>Maximum: 4 mg/kg/day or 200 mg/day                                                     | Main AEs include: dizziness, somnolence, fatigue, nausea, vomiting, constipation, upper respiratory tract infections, cough, influenza, convulsion, vertigo                                           | BRV decreased by 45% with rifampin; BRV decreased by 19%-26% with enzyme-inducing antiepileptic medication (e.g., carbamazepine, phenytoin, phenobarbital, primidone)<br><br>BRV increases phenytoin by 20% and carbamazepine epoxide by 100% |
| ZNS | Adjunctive therapy for partial onset seizures with or without secondary generalisation<br>EU: from 6 years<br>US: adults                     | Multiple including blocking sodium channels (changes in T-type Ca <sup>2+</sup> currents); binding to the GABA/benzodiazepine receptor ionophore complex (changes in chloride flux) | Initial: 1 mg/kg/day<br>Target: 6–8 mg/kg/day<br>Maximum: 500 mg/day                                                                  | Main AEs include: somnolence, anorexia, dizziness, headache, nausea, and agitation/irritability.<br><br>Warning: Serious rashes including cases of Stevens-Johnson syndrome.                          | The half-life of ZNS is significantly decreased with phenytoin, phenobarbital and carbamazepine, and moderately with VPA<br><br>ZNS + other carbonic anhydrase inhibitors (e.g. TPM) can increase the severity of metabolic                   |

|     |                                                                                                                                 |                                                                                                                                                |                                                                                      |                                                                                                                                                                                                                                       |                                                                                                                                                |
|-----|---------------------------------------------------------------------------------------------------------------------------------|------------------------------------------------------------------------------------------------------------------------------------------------|--------------------------------------------------------------------------------------|---------------------------------------------------------------------------------------------------------------------------------------------------------------------------------------------------------------------------------------|------------------------------------------------------------------------------------------------------------------------------------------------|
|     |                                                                                                                                 |                                                                                                                                                |                                                                                      | ZNS is teratogenic in various animals; likely risk to foetus in humans                                                                                                                                                                | acidosis and the risk of kidney stones                                                                                                         |
| ESM | Control of absence (petit mal) epilepsy                                                                                         | Suppresses the 3 Hz spike and wave activity associated with absence (petit mal) seizures by lowering thalamic T-Type Ca <sup>2+</sup> currents | Initial: 5–10 mg/kg/day<br>Target: 20–40 mg/kg/day<br>Maximum: 1500 mg               | Main AEs include: nausea, vomiting, singultus and abdominal pain                                                                                                                                                                      | ESM may increase phenytoin serum levels<br><br>VPA may increase ESM levels<br><br>Carbamazepine increases the plasma clearance of ethosuximide |
| PER | Adjunctive therapy for partial onset seizures with or without secondary generalisation<br>EU: from 4 years<br>US: from 12 years | Selective, non-competitive antagonist of the AMPA glutamate receptor on post-synaptic neurons                                                  | Depending on age:<br>Initial: 1–2 mg/day<br>Target: 4–8 mg/day<br>Maximum: 12 mg/day | Main AEs include: dizziness, somnolence, fatigue, irritability, falls, nausea, weight gain, vertigo, ataxia, headache, vomiting, contusion, abdominal pain, and anxiety<br><br>Warning: serious psychiatric and behavioural reactions | PER metabolism increased 2-3x (causing lower PER levels) by carbamazepine, oxcarbazepine, and phenytoin                                        |

Adapted from the corresponding Summary of Product Characteristics/Prescribing information and Nabbout et al 2021 [102]

AEs adverse events, BRV brivaracetam, ESM ethosuximide, EU European Union, LEV levetiracetam, MOA mechanism of action, PER perampanel, T-Type Ca<sup>2+</sup> threshold calcium currents, US United States, ZNS zonisamide
